# Supplementary material for: Anillin-dependent organization of septin filaments promotes intercellular bridge elongation and Chmp4B targeting to the abscission site
Source: PubMed Central journal article supplement (PMC3909275; doi:10.1098/rsob.130190), 2014-01-22

# Supplementary Figure S4

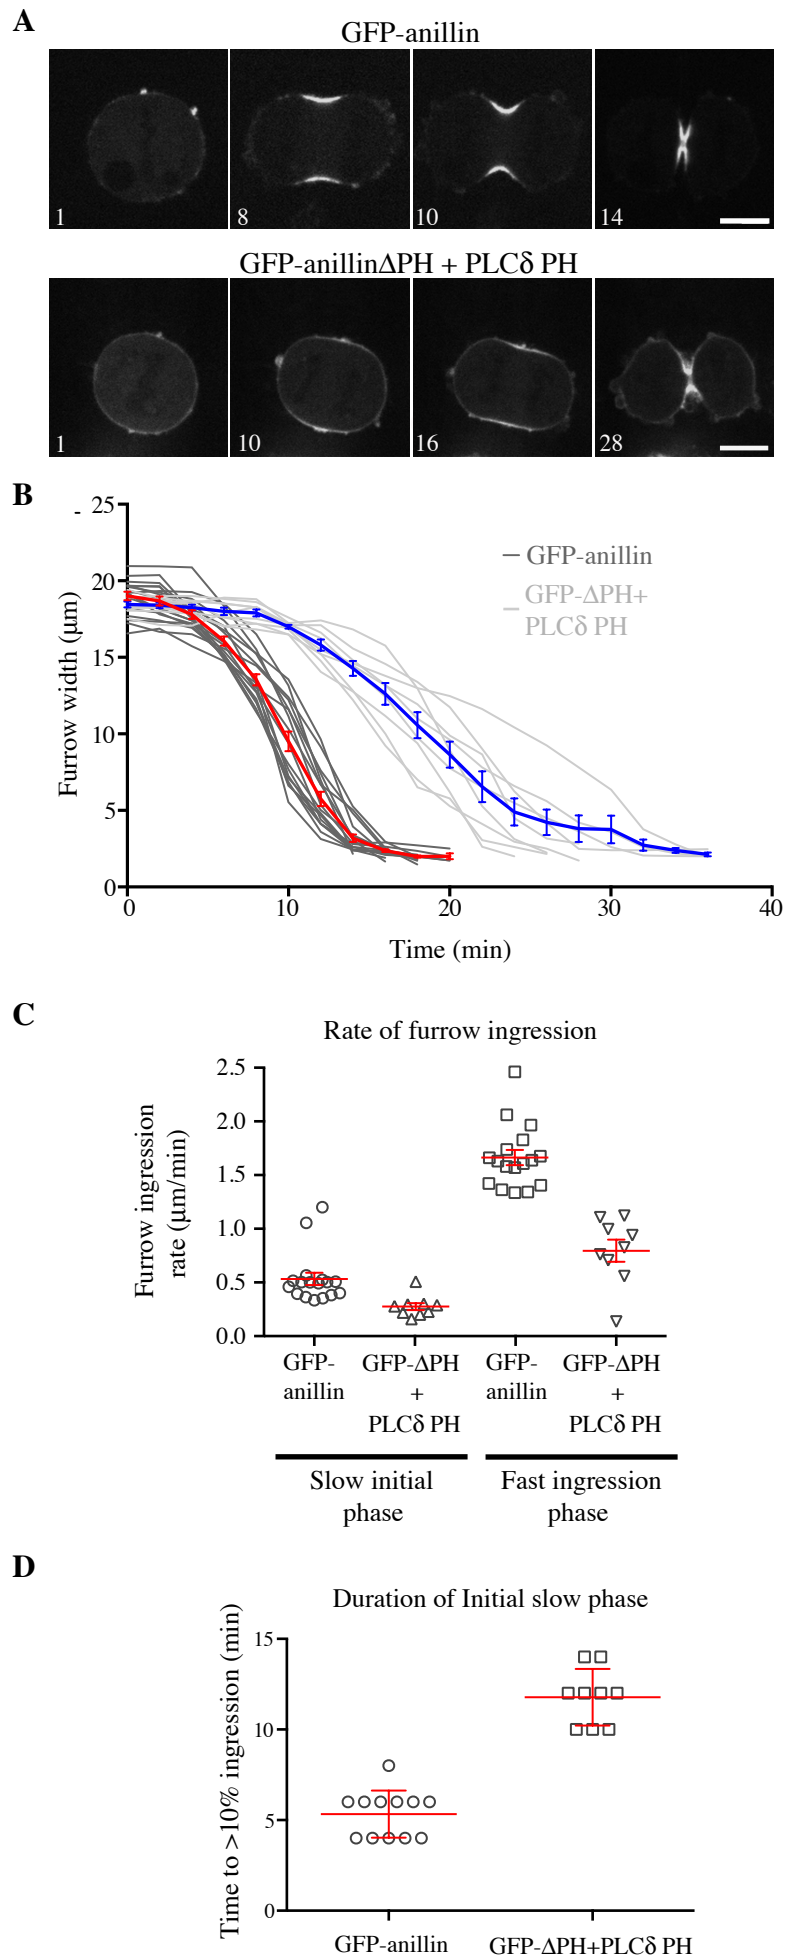

Supplement: rsob130190supp4.pdf [file rsob130190supp4.pdf]
